1 Roles of signaling compounds and WRKY31 in the defense of *Pinus massoniana* L.  
2 against *Dendrolimus punctatus*

3 Hu Chen<sup>1</sup>, Ying Hu<sup>2</sup>, Xingxing Liang<sup>1</sup>, Junkang Xie<sup>1</sup>, Huilan Xu<sup>1</sup>, Qunfeng Luo<sup>1</sup> and Zhangqi

4 Yang<sup>1\*</sup>

5 1. Guangxi Key Laboratory of Superior Timber Trees Resource Cultivation, Engineering research  
6 center of Masson Pine of state forestry administration, Engineering research center of Masson  
7 Pine of Guangxi, Guangxi Forestry Research Institute, Nanning 530002, PR China

8 2. Guangxi University, Nanning 530002, PR China

9 \*Corresponding authors. Fax: +86 +0771+2319901

10 E-mail address: yangzhangqi@163.com

11

12

13

14

15

16

17

18

19

20

21

22

23

24

25

26

27 **Abstract:**

28 *Dendrolimus punctatus* is an important pest affecting Masson pine (*Pinus massoniana*  
29 L.) forests and can cause serious economic and ecological losses. WRKY transcription  
30 factors play important roles in coping with various environmental stresses. In particular,  
31 recent studies have shown that WRKY transcription factors play an important role in  
32 plant responses against herbivorous insects. However, the mechanisms underlying the  
33 actions of these genes in the defense responses of *P. massoniana* L. are still unclear.  
34 Our previous study provided evidence that WRKY may play an important role in the  
35 insect resistance of *P. massoniana* L. In this study, application of semiochemicals such  
36 as exogenous hormones and Ca<sup>2+</sup> by spraying increased the concentrations of  
37 endogenous hormones, terpenoid synthases, and volatile substances in *P. massoniana* L.  
38 and effectively improved its resistance to *D. punctatus*. After analyzing the WRKY  
39 family of *P. massoniana* L., the PmWRKY31 gene was selected and studied. Yeast  
40 two-hybrid assays showed that the LP8 gene interacted with PmWRKY31.  
41 Fluorescence-based quantitative polymerase chain reaction showed that after treatment  
42 with exogenous hormones and Ca<sup>2+</sup>, the expression levels of the PmWRKY31 gene,  
43 hormonal signal-related genes, and terpene biosynthetic pathway-related genes were  
44 significantly increased, whereas the expression of the LP8 gene was decreased.  
45 Therefore, the PmWRKY31 and LP8 genes affected downstream gene expression by  
46 positively and negatively regulating the hormone signaling pathways, respectively.  
47 This result provides theoretical support for the involvement of WRKY transcription  
48 factors in the insect resistance of *P. massoniana* L. through their regulation of hormone  
49 signaling.

50 **Keywords:** *Pinus massoniana* L., *Dendrolimus punctatu*, WRKY transcription factor,  
51 calcium binding protein, hormonal signals, plant defense

## 52 **Introduction**

53 Herbivorous insects are important pests affecting agricultural and forestry production  
54 and can result in severe economic and ecological losses. The interaction between plants  
55 and insects can activate defense responses in plants[1]. This behavior is the first line of  
56 defense for plants. It involves the activation of different signal transduction pathways  
57 and downstream chain reactions, and the related transcription factors regulate defense  
58 gene transcription to synthesize special defense compounds and initiate defense  
59 responses[2].

60 The jasmonic acid (JA), salicylic acid (SA), ethylene (ET), and Ca<sup>2+</sup> signaling  
61 pathways play important roles in plant defense against insects[3-11]. Silencing of JA  
62 biosynthesis-related genes OsHI-LOX, AOS1, and AOS2 significantly reduces the  
63 damage of brown planthopper to rice plants and is regulated by transcription factors  
64 such as OsERF3, OsWRKY70, and OsWRKY24[7-9,12]. SA plays important roles in  
65 inducing insect resistance[13]. JA and SA can mutually induce defensive gene  
66 expression, indicating the synergy between the two[14].

67 Insect feeding induces the expression of defense genes in plants, as well as Ca<sup>2+</sup> flow  
68 and changes in intracellular JA and SA[15]. Ca<sup>2+</sup> and Ca<sup>2+</sup>-dependent protein kinase  
69 regulation is critical for enhancing the resistance of Arabidopsis to *Spodoptera*  
70 *littoralis*[16-17]. In the development of plant resistance, Ca<sup>2+</sup>, SA and JA cross-talk and  
71 enhance plant resistance through signaling cascades[18-19].

72 All plants have their own ‘fragrance’ to repel herbivorous insects, and it is key to  
73 determine the genes that regulate certain substances to produce as much of the  
74 ‘fragrance’ as possible to ‘reject’ the herbivorous insects from feeding[9]. Plants can  
75 generate many secondary metabolites, especially volatile metabolites such as terpenes,

76 to avoid harm from herbivorous insects. In the process of plant defense against  
77 herbivorous insects, the production of secondary metabolites is regulated by various  
78 hormones, such as JA, SA, and gibberellin (GA)[20]. WRKY transcription factors play  
79 important roles in regulating the resistance to insects, diseases, and abiotic stress in  
80 plants[21-25]. Among the WRKY transcription factors, WRKY3 and WRKY6 can  
81 regulate the insect resistance of tobacco plants and participate in the JA pathway [26].  
82 WRKY genes participate in the mechanism of insect resistance in tomato and  
83 *Arabidopsis*[27-28]. Systematic studies of rice WRKY transcription factors in insect  
84 defense have shown that they participate in a variety of hormone metabolic pathways  
85 enhancing insect resistance in rice[29-30].

86 *Pinus massoniana* L. is a very important timber species in China, accounting for  
87 more than half of the growing stock of forests in South China. It is also the major  
88 resin-producing tree species in the world[31]. The insect *D. punctatus* causes severe  
89 damage to approximately 130000 hectare of Masson pine forests every year, severely  
90 affecting tree growth and forest ecology[32]. Currently, the defense mechanism of *P.*  
91 *massoniana* L. against *D. punctatus* remains unclear. To understand the defensive  
92 signaling pathways of *P. massoniana* L., on the basis of a previous transcriptome  
93 analysis, we speculated that WRKY transcription factors play an important role in this  
94 defense. This study investigated the mechanisms of the WRKY-based defense system  
95 by screening their interacting genes, analyzing the hormones they stimulate, and  
96 detecting volatile substances in this pine.

## 97 **Materials and Methods**

### 98 **Plant growth and growth conditions**

99 The seeds of *P. massoniana* L. (No. 17-243) were from the F1 generation (Nanning  
100 China). Tobacco plants were grown from *Nicotiana benthamiana* seeds. The seeds

101 were stored in a refrigerator at 4 °C until use.

102 In April 2017, the seeds were sown in yellow soil for germination. When the buds grew  
103 to 5 cm tall, they were transplanted into nonwoven bags with a diameter of 12-15 cm.  
104 The light medium was formulated with 45-60% peat or coconut chaff, 20-30%  
105 carbonized rice chaff, 8-9.5% perlite, 1% calcium superphosphate, and 10-15% peat  
106 soil. The buds were planted in the breeding nursery for pine seedlings of the Guangxi  
107 Academy of Sciences (Nanning, Guangxi, China). Healthy 1-year-old seedlings of *P.*  
108 *massoniana* L. with good growth, the same height, no insect damage, and no  
109 mechanical damage were selected as experimental materials.

#### 110 **Experimental *D. punctatus***

111 The *D. punctatus* cocoons for experimental use were collected from the Masson pine  
112 orchards (Ningming and Nanning, Guangxi, China) and cultured in an incubator at 26 ±  
113 0.5 °C, under 16 h of light each day, and at relative humidity of 80%. Second-instar  
114 larvae were used for experiments.

#### 115 **Plant treatments**

116 The following treatment solutions were prepared: 75 mg/L abscisic acid (ABA), 75  
117 mg/L ABA + 100 mg/L CaCl<sub>2</sub>, 50 mg/L SA, 50 mg/L SA + 100 mg/L CaCl<sub>2</sub>, 100 mg/L  
118 MeJA, and 100 mg/L MeJA +100 mg/L CaCl<sub>2</sub>, 150 mg/L GA, 150 mg/L GA + 100  
119 mg/L CaCl<sub>2</sub>, and 100 mg/L CaCl<sub>2</sub> (dissolved in 50 mM phosphate buffer, pH 8.0).  
120 Distilled water was used as a control. Before use, 0.01 (v/v) Tween-20 was added to the  
121 solutions, and the treatment solutions were evenly sprayed on the *P. massoniana* L.  
122 seedlings once a day for 5 days at 200 mL/treatment. Ten *P. massoniana* L. seedlings  
123 with uniform growth were used for each treatment. Mature needles at the same site  
124 were collected 1, 3, and 5 days after the treatment ended. The needles collected were

125 divided into two groups. One group was immediately tested to measure the volatile  
126 substances. The other group was immediately stored in liquid nitrogen, transferred to  
127 the laboratory, and stored at -80 °C for future use. ABA, SA, JA, and GA (purity > 95%)  
128 were purchased from Sigma-Aldrich.

#### 129 ***D. punctatus* feeding treatment**

130 An insect incubator was used for each *D. punctatus* feeding treatment, and 15 *D.*  
131 *punctatus* of same size were selected for each treatment. On day 3, the *D. punctatus*  
132 were observed. The effects of different treatments on *D. punctatus* were investigated  
133 based on their food intake and growth conditions. The food intake calculation formula  
134 for larvae was as follows: daily food intake = (amount of feed input - amount of residual  
135 feed) × (1 - water loss rate). The treatments were carried out in net houses.

#### 136 **RNA extraction and reverse transcription**

137 RNA was extracted according to the instructions of the RNA Isolation Kit for  
138 polyphenol- and polysaccharide-rich plants (Tiangen Biotech, Beijing, China). The  
139 reverse transcription primer was Oligo(dT)18: 5'-GGCCACGCGTCGACTAG  
140 TAC(T)18-3'. The specific cDNA was synthesized according to the instructions of  
141 M-MLV reverse transcriptase. After completion, 4 µL of the polymerase chain reaction  
142 (PCR) product of each treatment was used for agarose gel electrophoresis, and the  
143 cDNA concentration of each treatment was measured using a UV spectrophotometer  
144 and then diluted to the same concentration.

#### 145 **Isolation and characterization of gene expression from cDNA**

146 Based on transcriptome data (transcriptome data uploaded to NCBI GEO, accession  
147 number GSE72294.) and protein–protein interactions, the full lengths of the WRKY2,  
148 WRKY6, PMWRKY31, and LP8 genes were obtained. Primer 5 software was used to  
149 design full-length primers to amplify these genes (Table S1). The PCR products were

150 cloned into the pMD19-T vector (TaKaRa) and sent to Sangon Biotech (Shanghai,  
151 China) for sequencing.

### 152 **Bioinformatics analysis**

153 WoLFPSORT software was used to predict the subcellular localization of proteins. The  
154 amino acid sequences of the proteins were constructed with ClustalX and MEGA4.1  
155 software. The online software of NCBI, SMART, and Motif Scan were used to analyze  
156 the functional domains of genes. Protein–protein interactions were predicted using  
157 string (<https://string-db.org/cgi>). Transcriptome data and QuickGO  
158 (<https://www.ebi.ac.uk/QuickGO/>) were used to predict gene function, and the Kyoto  
159 Encyclopedia of Genes and Genomes (KEGG) data were used for metabolic pathway  
160 analysis.

### 161 **Subcellular localization**

162 The constructed pBWA(V)HS-wrky-GLogfp vector plasmid was transferred into  
163 Agrobacterium. After Agrobacterium-coated plates were incubated at 30 °C for 2 days,  
164 Agrobacterium was inoculated into 10 mL YEB liquid medium and resuspended in 10  
165 mM MgCl<sub>2</sub> suspension (containing 120 μM AS), and the optical density measured at a  
166 wavelength of 600 nm (OD<sub>600</sub>) was adjusted to approximately 0.6. The suspension  
167 was injected into the epidermis of a tobacco leaf with a 1-mL syringe (needle removed).  
168 After injection, the tobacco plants were cultured under low light intensity for 2 days.  
169 Next, the tobacco leaves were collected and imaged directly under a laser confocal  
170 microscope (FV10-ASW, OLYMPUS, Shenzhen, China). In the subcellular  
171 colocalization experiment, except that the nuclear marker and the plasmid vector were  
172 simultaneously transferred to Agrobacterium before plating and incubation, all other  
173 steps were the same.

### 174 **Transgene expression**

175 Sterile tobacco seedlings were induced using mature tobacco embryos. The plasmid  
176 pBI121\_PmWRKY31 was constructed and transferred to *Agrobacterium* EHA105 and  
177 stored in a -80 °C freezer. The *Agrobacterium*-mediated transformation of tobacco  
178 seedlings followed the steps described by Yu et al.[33]. The cetyltrimethylammonium  
179 bromide (CTAB)-based method was used to extract DNA from tobacco seedlings, and  
180 primers specific for resistance genes (Table S1) were used to amplify and detect the  
181 presence of PmWRKY31 in tobacco seedlings using the conventional PCR method.  
182 Transgenic lines were screened from the F3 generation of tobacco plants transduced  
183 with PmWRKY31, morphological indicators were observed, and hormones, volatile  
184 substances, and resistance were determined.

#### 185 **Yeast two-hybrid assay**

##### 186 **Construction of the cDNA library**

187 After RNA extraction, cDNA was synthesized and purified. The purified cDNA was  
188 homogenized and further purified. The cDNA was digested using the restriction  
189 endonuclease SfiI. After the digested cDNA was passed through CHROMA  
190 SPIN-1000-TE columns, an appropriate amount of cDNA was ligated into the  
191 pGADT7-SfiI vector (TaKaRa, China) at 12 °C using the DNA ligation kit (O/N linked)  
192 and purified to obtain the primary cDNA library, which was electroporated into HST08  
193 competent cells. Ten large Luria-Bertani (LB) agar plates (24.5 × 24.5 cm) were coated  
194 with these cells and cultured overnight at 37 °C, and the number of clones obtained  
195 after the transformation was monitored.

##### 196 **Yeast two- and four-hybrid assays**

197 Five micrograms of the bait plasmid was transformed into Y187 yeast, and 100 SD/Leu  
198 plates were coated with the yeast and cultured at 30 °C for 3 days. The  
199 pGBKT7-PmWRKY31 plasmid vector was constructed, and the bait plasmid was



200 transformed into the Y2Hgold strain to obtain the bait strain. The expression of the  
201 exogenous proteins in the bait strain was detected by western blotting.

202 Two-hybrid screening: Bait-Y2HGold strains were cultured using the streak plate  
203 method for 3 days. Colonies were picked and cultured in SD/-Trp broth and mated to  
204 the Y187 yeast library. A small amount of suspension was diluted to 1/10, 1/100,  
205 1/1000, and 1/10000, and 100  $\mu$ L of the diluted suspension was used to coat 100-mm  
206 monitoring plates. The suspension was coated onto 50 to 55  
207 SD/-Trp/-Leu/X-a-Gal/Aba plates for two-hybrid screening.

208 Four-hybrid screening: The blue colonies were counted and inoculated onto  
209 SD/-Ade/-His/-Leu/-Trp/X/A plates with a pipette tip and cultured at 30 °C for 5 days.  
210 The positive bacterial strain was used as a template for PCR amplification. The AD  
211 plasmids in the positive clones were detected, and the amplified products were detected  
212 by electrophoresis and sequenced.

### 213 **Bimolecular fluorescence complementation (BiFC)**

214 The LP8, WRKY2, WRKY6, and PmWRKY31 genes were separately cloned into the  
215 pSPYNE-35S vector. The proteases were isolated from 3-to-4-week-old Arabidopsis  
216 plants with robust growth, transfected by the polyethylene glycol (PEG) method, and  
217 observed under a confocal microscope (FV10-ASW, OLYMPUS).

### 218 **Pull-down assay**

219 Primers for the PmLP8 and PmWRKY31 genes were designed in CmSuite8 software  
220 (Table S1). The target gene fragment was amplified by the high-fidelity PrimeSTAR  
221 DNA Polymerase with the WRKY plasmid as the template. Five micrograms of the  
222 pGEX-4T-1 vector was digested with XhoI and BamHI to recover the target fragment.  
223 Ligation was performed according to the manufacturer's instructions of the  
224 ClonExpress II One Step Cloning Kit (Vazyme Biotech). The ligation products were

225 transformed into Stbl3 competent cells and screened on LB plates containing  
226 kanamycin and ampicillin antibiotics (100 µg/mL). Positive clones were confirmed by  
227 sequencing.

228 The fusion protein was subjected to prokaryotic expression, pull-down, western blot  
229 detection, electrophoresis, transfer onto membranes, antibody incubation, and exposure  
230 according to the manufacturers' instructions. GST antibody and HIS antibody were  
231 purchased from TRANS (Shenzhen, China), and HRP-labeled goat anti-mouse IgG  
232 was purchased from CWBiotech (Beijing, China).

### 233 **Real-time fluorescence-based quantitative PCR**

234 Key genes involved in metabolic pathways, such as ABA, GA, JA, SA, and terpene  
235 biosynthetic pathways, which might interact with WRKY genes, were selected. Primer  
236 5 software was used to design primers for fluorescence-based quantitative PCR, and the  
237 cyclophilin (CYP) gene was used as a reference gene (Table S1) [34]. The LightCycler  
238 480II PCR system was programmed according to the instructions of the SYBR Premix  
239 Ex *Taq* II (Perfect Real Time) kit (TaKaRa, China) to conduct fluorescence-based  
240 quantitative PCR. All experiments were run three times. The relative expression level  
241 was calculated according to the  $2^{-\Delta\Delta C_t}$  method[35], and Microsoft Excel was used for  
242 plotting.

### 243 **Determination of volatiles substances**

244 Volatile substances were determined by a SCION single-quadrupole (SQ) and  
245 triple-quadrupole (TQ) gas chromatography (GC)–mass spectrometry (MS) system.  
246 Each treatment (0.5 g) was placed in a 10-mL-headspace bottle, and an appropriate  
247 amount of anhydrous sodium sulfate was added. After an aged solid-phase  
248 microextraction fiber was inserted into the bottle, the bottle was sealed and put into a 75  
249 °C thermostat bath for 15 min. The extract was subjected to GC-MS analysis. Each

250 experiment was run three times.

### 251 **Determination of semiochemicals**

252 First, 0.1 g of sample was ground in liquid nitrogen, added to 1 mL methanol solution  
253 (methanol:water:formic acid = 75:20:5). After 16 hours of extraction in darkness, the  
254 supernatant was collected by centrifugation. The above steps were repeated once, and  
255 the supernatant was collected and combined with the previously obtained supernatant.  
256 The combined supernatant was concentrated and evaporated at 35 °C until there was no  
257 residual methanol (changed color). Then, 500 microliters of ethyl acetate was added to  
258 the remaining aqueous phase for extraction, and the upper, ester phase was taken. This  
259 step was repeated two times, and the obtained ester phases were combined. The  
260 combined ester phase was concentrated and evaporated at 35 °C till dry. The precipitate  
261 was dissolved in 200 µL of methanol, filtered through a 0.22-µm organic membrane,  
262 and tested by a liquid chromatography (LC)–MS system (6460 Triple Quad LC/MS,  
263 Agilent, USA) with a C18 column (2.1 mm × 100 mm, 1.9 µm). According to the  
264 plotted standard curve and the peak area of the substance in the sample tested, the  
265 concentration of the substance in the sample was calculated.

### 266 **Detection of terpene synthases (TPSs)**

267 A total of 0.1 g mixed sample was added into 900 µL of phosphate-buffered saline (1:9  
268 weight:volume ratio) and fully ground to homogenate on ice. After the homogenate was  
269 centrifuged at 5000 × g for 5-10 min, the supernatant was taken for detection. A plant  
270 TPS ELISA kit for (Shanghai, China) was used for the detection of TPSs in different  
271 samples according to the manufacturer's instructions. The microplate reader was  
272 purchased from Epoch (BioTek, USA).

### 273 **Results and analysis**

#### 274 **The role of WRKY transcription factors in insect resistance**

275 Three WRKY genes were highly expressed in insect-resistant Masson's pine  
276 varieties (Fig. 1a). According to the cDNA sequences of the three genes obtained from  
277 the transcriptome data, they were PmWRKY2, PmWRKY6, and PmWRKY31,  
278 encoding 667, 575, and 642 amino acids, respectively (Table S2). All three genes had  
279 the typical WRKY domains of the WRKY family (Fig. 1b, Fig. 1c, Table S2). WRKY2  
280 was successfully annotated in the KEGG Orthology (KO), indicating that WRKY2 is  
281 involved in plant pathogen defense (Fig. 1d). Therefore, we hypothesized that WRKY2  
282 is involved in the defense of *P. massoniana* L. against herbivorous insects.

283 Seventy-four volatile substances were detected, and 45 of them were successfully  
284 identified. Among the identified volatile substances, 30 were terpenes.  $\alpha$ -Pinene and  
285  $\beta$ -pinene showed opposite abundance patterns (Fig. 1e). TPSs and hormones play roles  
286 in insect resistance (Sakamoto et al., 2004; Eric et al., 2010; Hu et al., 2015; Liu et al.,  
287 2016). Whether both WRKYs and TPSs participate in the insect resistance of *P.*  
288 *massoniana* L. and their relationships with semiochemicals needed to be clarified.

### 289 **Screening of PmWRKY31 transcription factor interaction genes**

290 To further investigate the function of PmWRKY31 in the insect resistance of *P.*  
291 *massoniana* L., we constructed the cDNA library (Fig. S1) and the two-hybrid bait  
292 system (Fig. S2). The bait strains did not self-activate and had no toxicity (Fig. S3a).  
293 They were highly expressed in the positive control according to the western blot (Fig.  
294 2a). Two colonies (Fig. S3b-d) were obtained by two-hybrid screening and four-hybrid  
295 screening (Fig. 2b). The positive control and negative control showed the expected  
296 results (Fig. 2c). Sequencing of the PCR amplification product revealed the  
297 calcium-binding protein LP8 (Fig. 2d). This gene contained three EF-hand  
298 calcium-binding domains and a secreted protein acidic and rich-in-cysteine  
299  $\text{Ca}^{2+}$ -binding region (Fig. 2e).

### 300 **Confirmation of the interaction between PmWRKY31 and PmLP8**

301 To further confirm the interaction between PmWRKY31 and LP8, we performed  
302 pull-down experiments (Fig. 3a). We also used BiFC technology to further confirm the  
303 protein–protein interactions between LP8 and the three WRKY genes of *P. massoniana*  
304 L. (Fig. S4). The results showed that LP8 interacted with WRKY2, WRKY6, and  
305 WRKY 31 in the nuclei of plant cells (Fig. 3b). Subcellular localization of WRKY31  
306 also indicated that WRKY31 was located in the nucleus (Fig. 3c, d).

### 307 **PmWRKY31 improves insect resistance by negatively regulating LP8 and** 308 **participating in JA signaling**

309 To confirm whether PmWRKY31 regulates these signaling pathways, we examined the  
310 semiochemicals, gene expression, terpenes, and feeding characteristics of *D. punctatus*  
311 under treatment with these substances.

312 JA under Ca<sup>2+</sup> treatment did not differ from the control level on day 1, but JA under  
313 the other treatments was significantly different from the control at all times (P<0.01).  
314 The JA and JA + Ca treatments significantly improved the JA concentration (Fig. 4a).  
315 Moreover, the JA + Ca treatment significantly increased the TPS concentration and  
316 increased the concentrations of a variety of volatile substances (Fig. 4b). Different  
317 treatments increased many volatile substances in the needles, such as caryophyllene  
318 and β-pinene (Fig. 4c). The *D. punctatus* feeding experiment showed that after  
319 treatments, the food intake and excrement of *D. punctatus* significantly decreased.  
320 Particularly, on day 3 of JA treatment, 64% of *D. punctatus* had died, and the weight of  
321 the surviving *D. punctatus* had decreased sharply (Fig. 4d).

322 To further investigate whether WRKY transcription factors are involved in the insect  
323 resistance of *P. massoniana* L. and its responses to different hormone signaling  
324 pathways, we performed real-time fluorescence-based quantitative PCR.

325 PmWRKY31 expression was significantly induced under different treatments,  
326 especially on day 5, while the expression of the LP8 gene was downregulated under  
327 different treatments. We also examined the expression of five JA biosynthesis-related  
328 genes, LOX, AOS1, AOC, PLDA, and PLDB, under different treatments. As shown in  
329 Fig. 4, LOX, AOS1, and AOC were significantly increased at the early stage of  
330 treatment, while PLDA and PLDB only increased at the late stage of treatment.  
331 Treatment with Ca alone did not improve the expression of monoterpene, sesquiterpene,  
332 or diterpene genes in the volatile substances. JA treatment increased the expression of  
333 SS and AS, while JA + Ca treatment had the most significant improvement on the  
334 expression level of MS (Fig. 4e). We speculated that the PmWRKY31 gene  
335 improves the insect resistance of *P. massoniana* L. by negatively regulating the Ca<sup>2+</sup>  
336 signaling pathway and LP8 activity and participating in the JA metabolic pathway.

### 337 **PmWRKY31 improves insect resistance by participating in GA signaling**

338 We further investigated the effect of exogenous GA and Ca treatments on GA  
339 biosynthesis. The results showed that on the 5th day after treatment, the TPS  
340 concentrations of the three treatments were significantly higher than those of the  
341 control (Fig. 5a), indicating that exogenous GA and Ca participated in the biosynthesis  
342 of terpenes and significantly improved the concentrations of caryophyllene,  
343  $\beta$ -cubebene, and  $\gamma$ -elemene (Fig. 5c). After treatment, the food intake and weight of *D.*  
344 *punctatus* were significantly lower than those in the control group (Fig. 5d). This  
345 indicated that the treatments prevented *D. punctatus* from feeding on *P. massoniana* L.  
346 Ca treatment did not significantly increase the GA concentration, while the GA and GA  
347 + Ca treatments did (Fig. 5b). At the same time, the expression level of LP8 was  
348 significantly decreased after different treatments, and the expression level of  
349 PmWRKY31 under Ca treatment was the highest (Fig. 5e). This result indicated that

350 PmWRKY31 positively regulated the GA pathway and LP8 negatively regulated the  
351 GA pathway. In addition, exogenous treatments, especially GA treatment, positively  
352 regulated terpene biosynthetic pathways. The genes involved in the GA biosynthetic  
353 pathway, except for GGPS, were all downregulated (Fig. 5e).

#### 354 **PmWRKY31 improves insect resistance by participating in SA and ABA signaling** 355 **pathways**

356 Under different treatments, the expression level of PmWRKY31 was significantly  
357 higher than it was in the control (Fig. 5c, Fig. 5d). The expression of PmLP8 was  
358 downregulated under both JA and SA treatments (Fig. 5c, Fig. 5d). Overall, SA  
359 treatment alone and ABA treatment alone significantly increased the expression levels  
360 of TPS biosynthesis-related genes in the SA and ABA pathways (Fig. 5c, Fig. 5d).  
361 However, Ca + ABA treatment significantly increased the TPS level, whereas the  
362 application of Ca alone significantly increased the TPS level in the SA pathway. In  
363 addition, different treatments had different influences on the concentrations of ABA  
364 and SA: Ca treatment significantly increased ABA, and SA treatment worked best at  
365 increasing SA (Fig. 5a, Fig. 5b). The substances affected by the four hormone pathways  
366 were basically the same. The only difference was that exogenous SA and Ca treatments  
367 significantly increased the concentration of bicyclo[4,4,0]dec-1-ene,  
368 2-isopropyl-5-methyl-9-methylene (Fig. S5).

#### 369 **Verification of the function of the PmWRKY31 gene**

370 To further study the function of the PmWRKY31 gene, we conducted overexpression  
371 experiments. The height and root length of PmWRKY31- overexpressing plants were  
372 significantly higher than those of the control, and the number of lateral roots, lateral  
373 root length, leaf number, and leaf size were significantly lower than those of the control  
374 (Fig. 7a). Although the PmWRKY31-overexpressing plants were smaller than the

375 wild-type plants, their resistance to tobacco anthracnose (Fig. 7b) and drought (Fig. 7c)  
376 was significantly stronger than that of the wild-type plants. Similarly, the resistance of  
377 PmWRKY31-overexpressing tobacco plants against *Helicoverpa assulta* Guenee was  
378 also significantly improved. We tried to feed the tobacco leaves of the  
379 PmWRKY31-overexpressing and wild-type tobacco plants to *D. punctatus*, but the  
380 insect accepted neither of them. In summary, the above experiments further confirm  
381 that the PmWRKY31 gene plays a key role in insect resistance as well as resistance to  
382 diseases and abiotic stresses.

383 Further analysis of the volatile substances showed that after PmWRKY31  
384 overexpression, the concentrations of more than 10 volatile substances, especially  
385 longifolene, changed (Fig. 7d). This result indicated that the changes in terpene  
386 concentrations were consistent with the changes in expression levels of TPS genes. We  
387 also analyzed the changes in hormone levels. The results showed that the JA and ABA  
388 concentrations of PmWRKY31-overexpressing plants were both higher than those of  
389 wild-type plants. This indicates that the PmWRKY31 gene regulates the expression of  
390 hormone signaling genes by interacting with the PmLP8 gene, thereby increasing the  
391 terpene concentrations to improve insect resistance. We also attempted to determine the  
392 Ca<sup>2+</sup> concentrations in needles of *P. massoniana* L. and tobacco leaves, but the  
393 experimental data were not ideal.

## 394 **Discussion**

### 395 **Effect of PmWRKY31 overexpression on plant type**

396 Many phenotypes of the PmWRKY31-overexpressing plants were less desirable than  
397 those of wild-type plants. In previous studies, OsWRKY28-overexpressing rice plants  
398 became dwarf but had no changes in other phenotypes[29,36]. In our study, the  
399 situation was different-morphological changes were observed. The causative



400 mechanism is unclear and needs further investigation.

#### 401 **PmWRKYs are key regulators of insect feeding–induced defense responses**

402 After screening, we obtained three WRKY genes that were associated with the insect  
403 resistance of *P. massoniana* L. All of them contained the specific and conserved  
404 WRKY domains of the WRKY family and proteins that specifically bind to W-boxes  
405 [37]. Clustering analysis can well classify the WRKY genes according to the  
406 characteristics of their zinc finger domains[38].

407 The results of this study all indicated that PmWRKY proteins play important roles in  
408 the insect resistance of *P. massoniana* L. First, PmWRKY were induced by JA, GA,  
409 ABA, SA and Ca treatments. Second, overexpression of PmWRKY changed the  
410 concentrations of JA, GA, ABA, SA, and volatile substances in tobacco plants and  
411 improved their insect resistance, disease resistance, and drought resistance. Third,  
412 PmWRKY interacted with the Ca<sup>2+</sup> signaling protein LP8 and changed hormone and  
413 TPS concentrations.

#### 414 **Possible mechanism of the interaction between PmWRKY31 and Ca<sup>2+</sup> signaling**

415 Ca<sup>2+</sup> signaling is involved in plant defense against herbivorous insects, and insect  
416 feeding can activate Ca<sup>2+</sup> signaling[39-41]. However, in the interaction between *D.*  
417 *punctatus* and *P. massoniana* L., the relationship between the Ca<sup>2+</sup> signaling and the  
418 defense response of *P. massoniana* L. induced by *D. punctatus* is still unknown. We  
419 found that the addition of exogenous Ca increased the concentrations of TPSs,  
420 hormones, and volatile substances in *P. massoniana* L. plants and significantly  
421 upregulated PmWRKY31. However, LP8 was downregulated. Therefore, we  
422 hypothesized that PmWRKY31 downregulated LP8 to improve the resistance of *P.*  
423 *massoniana* L. against *D. punctatus*. The downregulation of the LP8 gene has been  
424 found in a study on the defense of *P. massoniana* L. against *Bursaphelenchus*

425 *xylophilus*[42]. Ca<sup>2+</sup> phosphorylation regulates the JAV1–JAZ8–WRKY51 network to  
426 improve the insect resistance of plants[41]. The Ca<sup>2+</sup> in chloroplasts can positively  
427 regulate MPK3/MPK6 activity[43]. The calcium-dependent protein kinases and  
428 mitogen-activated protein kinases (MAPKs) can positively regulate the pathogen  
429 defense of *Arabidopsis*[44]. WRKY proteins can regulate MAPK genes to improve the  
430 insect resistance of rice[7,29,45-46]. In this study, we demonstrated that PmWRKY31  
431 and LP8 can interact both in vivo and in vitro through yeast two-hybrid, BiFC, and  
432 pull-down assays and that this interaction played an important role in the responses of *P.*  
433 *massoniana* L. to a herbivorous insect.

434 **PmWRKY31 plays an important regulatory role in the insect resistance**  
435 **mechanism of *P. massoniana* L. against herbivorous insects**

436 WRKY transcription factors play key roles in hormone signaling pathways and in the  
437 regulation of plant resistance genes[26,38,47-49]. We found that application of  
438 exogenous JA, SA, ABA, or GA by spraying increased the JA, SA, ABA, or GA  
439 concentrations in needles of *P. massoniana* L. and significantly upregulated the  
440 PmWRKY31 gene. This result indicates that the PmWRKY31 gene improved the  
441 insect resistance of *P. massoniana* L by participating in the JA, SA, ABA, and GA  
442 signaling pathways. In addition, the JA and ABA concentrations significantly increased  
443 in PmWRKY31-overexpressing tobacco plants. Overexpression of OsWRKY13 and  
444 OsWRKY30 in rice enhances the resistance of rice plants to leaf blight and rice blast  
445 [50-51]. OsWRKY53 can positively regulate SA biosynthesis[29]. OsWRKY13 can  
446 activate ICS1, a key enzyme in SA biosynthesis, and overexpression of OsWRKY13  
447 can induce high accumulation of SA[50]. ThWRKY4 can increase the tolerance of  
448 ABA-treated *Tamarix hispida*[52]. Based on the above evidence and our experimental  
449 results, it can be concluded that the targets of PmWRKY31 could be JA, GA, and SA

450 biosynthesis-related genes, including LOX/AOS1/AOC[1,12], and ICS[53-54].

451 However, whether PmWRKY31 directly or indirectly binds to the W-box of these gene

452 promoters remains unclear.

453 **PmWRKY31 plays an important regulatory role in the biosynthesis of terpenes**

454 **for the insect resistance of *P. massoniana* L.**

455 TPSs play a role in insect resistance[55-56]. They are also involved in the biosynthesis

456 of phytoalexin and the regulation of some hormonal substances in the plant defense

457 responses[57]. TPS genes have been cloned from more than 40 species of plants [58].

458 In the constitutive and induced plant defenses against herbivorous insects, the

459 biosynthesis of terpenes is regulated by a variety of hormones (including endogenous

460 and exogenous hormones). The defensive metabolites of GA and diterpene in rice

461 plants have been studied in detail, and the results indicate that a GAOsCPS1 gene

462 downstream of the GA pathway may be involved in the biosynthesis of terpenes [55].

463 SA can significantly improve the insect resistance of plants[59-60]. The WRKY1 gene

464 can bind to the W-box of the CAD1-A promoter, activate the expression of CAD1-A,

465 and play an important regulatory role in secondary metabolism. It can also interact with

466 JA and GA signaling molecules to coordinate the biosynthesis and volatilization of

467 terpenes[20]. Our study showed that treatment with one or more of JA, GA, SA, ABA,

468 and Ca<sup>2+</sup> increased the concentrations of TPSs and volatile terpenes and the expression

469 of monoterpene synthase (MS), sesquiterpene synthase (SS), and diterpene synthase

470 (AS) genes. Overexpression of PmWRKY31 significantly increased the concentration

471 of sesquiterpenes. Therefore, PmWRKY31 might indirectly affect the concentration of

472 terpenes in plants, thereby improving the insect resistance of plants.

473 **Conclusions**

474 In summary, treatments with exogenous semiochemicals increase the concentrations of

475 endogenous hormones and TPSs of *P. massoniana* L., strongly induce the expression of  
476 PmWRKY31, but inhibit the expression of LP8. PmWRYK31 interacts with LP8 and  
477 regulates the expression of JA, GA, and SA genes, thereby promoting the expression of  
478 TPS genes and increasing the concentrations of volatile substances such as terpenes  
479 (Fig. 8). All of the above improve the resistance of *P. massoniana* L. to *D. punctatus*.

#### 480 **Supplementary Data**

481 Supplementary Data for this article are available at PLOS ONE online.

#### 482 **Fig S1. Production of cDNA library**

483 a: RNA extraction. 300 ng of RNA was taken for 1.5% agarose gel electrophoresis to check the  
484 quality of RNA. b: Construction of cDNA library. cDNA was synthesized by using Clontech's  
485 SMART cDNA Library Construction Kit and Advantage 2 PCR Kit. 3  $\mu$ L cDNA was subjected to  
486 1.5% agarose gel electrophoresis. c: Homogenization of cDNA synthesis. PCR was performed by  
487 using Normalization Kit and the Advantage 2 PCR Kit amplify to obtain homogenized cDNA, and  
488 1  $\mu$ L cDNA was taken for 1.5% agarose gel electrophoresis. d: Removal of short fragment. The  
489 short fragment of enzyme was removed using CHROMA SPIN-1000-TE. 1  $\mu$ L cDNA was  
490 subjected to 1.5% agarose gel electrophoresis after cleaned up by PCI/CI, refined in ethanol, and  
491 solubilized in dH<sub>2</sub>O. e: Measurement of primary library volume. Amp-resistant LB plates were  
492 coated with transfer solution and incubated overnight at 37°C; primary libraries were counted by  
493 the number of colonies grown on the plates. 1 library: > approximately 4.4x10<sup>6</sup>cfu; 2 libraries: >  
494 approximately 2.8x10<sup>6</sup>cfu; 3 libraries: > approximately 4.6x10<sup>6</sup>cfu. 1: Total RNA of *Pinus*  
495 *massoniana* needles or stems; M1, 2: synthesis of cDNA, 3: homogenizd cDNA, 4: post-column  
496 cDNA, 5: amplified plasmid, Lambda EcoT14 I digest (TaKaRa Dalian, China), M2. 250 bp DNA  
497 Ladder (TaKaRa Dalian, China).

#### 498 **Fig S2. Construction of yeast two-hybrid Bait**

499 a: PCR amplication. According to WRKY31sequence, primers CLA354\_WRKY31:  
500 CATGGAGGCCGAATTCATGGAAGCAGTGGGGTTGAGTCTT and CLA354\_ WRKY31:  
501 GCAGGTCGACGGATCCTCACTGGAGCAATTTAGCCGAAGC were designed PCR  
502 amplication. b: Target fragment. c: Amplification of CLA354\_WRKY31 plasmid as template.

503 primersCLA420\_WRKY31: CATGGAGGCCGAATTCATGGAAGCAGTGGGGTTGAGTCTT  
504 and, CLA420\_WRKY31: GCAGGTCGACGGATCCTCACTGGAGCAATTTAGCCGAAGC  
505 were designed. d: Target fragment. M: 250bp DNA Marker.

#### 506 **Fig S3. Bait strain self-activation test and two-hybrid screening**

507 a: Self-activation and toxicity assay of bait strain. Transformed bait plasmid into Y2Hgold strain  
508 to obtain bait strain, and bait strain was tested for self-activation and toxicity. b-d:  
509 Double-deficiency screening, Bait-Y2HGold strains were cultured for 3 days, and 2-3 mm  
510 colonies were picked up to incubate in SD/-Trp liquid medium, later, mating test was performed  
511 with a Y187 yeast library. Shake the bacteria slowly at 30-50 rpm for 24 h with incubation  
512 temperature 30 °C . Washed and suspended the yeast cells with 0.5 x YPDA (50 ug/mL kana).  
513 Diluted a small amount of the suspension by 1/10, 1/100, 1/1000, 1/10000 and applied 100 uL of  
514 the suspension to 100 mm monitor plates, and 50-55 SD/-Trp/-Leu/X-a-Gal/Aba  
515 double-deficiency screening plates were applied the suspension for screening.

#### 516 **Fig S4. Vector construction of BiFC test for four genes**

517 Using needles and stems of *Pinus massoniana* as materials, amplification primers were designed  
518 according to the gene sequences of lp8, wrky2, wrky6 and wrky31. The target genes were  
519 amplified by using plasmids and cDNA as templates. The target gene lp8 was constructed on the  
520 pSPYNE-35S vector, and the wrky6, wrky2 and wrky31 were constructed on pSPYCE-35S  
521 vector.

#### 522 **Fig S5. Defense reaction in of ABA and SA pathways with PmWRKY31**

523 a: Continuous variation of volatile matter content of needles in different treatments. b: Effects of  
524 different treatments on feeding and excretion of Dendrolimus. Each sample was repeated 3 times,  
525 \* p< 0.05, \*\* p< 0.01, Student's t-test.

#### 526 **Table S1 Information on the primers in the experiment.**

#### 527 **Table S2 Bioinformatics analysis of 4 genes and domain prediction.**

#### 528 **Conflict of Interest**

529 None declared.

530

531 **Funding**

532 This research was supported by The Natural Science Foundation of China (#31660219, 32060348),  
533 The special fund for Bagui scholar and Bagui young scholar, The Guangxi Natural Science  
534 Foundation (Grant #2018GXNSFAA294057, 2019GXNSFDA24502), Guangxi innovation-driven  
535 project (#AA17204087-1, # AA17204087-4).

536 **Authors' Contributions**

537 H.C. designed and conducted the experiments, and write the manuscript; X.L. contributed to  
538 manuscript writing and editing, Y.H. performed the bioinformatics tools, J.X., H.X., and Q.L.  
539 performed the physiology biochemistry experiment and analyzed of data, Z.Y. contributed to  
540 experimental design and editing. All authors read and approved the final manuscript.

541 **References**

- 542 1. Erb M, Meldau S, Howe GA (2012) Role of phytohormones in insect-specific plant reactions.  
543 Trends in Plant Science 17: 250-259.
- 544 2. Howe GA, Jander G (2008) Plant immunity to insect herbivores. Annual Review of Plant  
545 Biology 59: 41-66.
- 546 3. Walling LL (2000) The myriad plant responses to herbivores. J Plant Growth Regul 19:  
547 195-216.
- 548 4. Ye S, Jiang Y, Duan Y, Karim A, Luo K (2014) Constitutive expression of the poplar wrky  
549 transcription factor ptowrky60 enhances resistance to dothiorella gregaria sacc. in transgenic  
550 plants. Tree Physiology 34: 1118.
- 551 5. Reymond P, Bodenhausen N, Van Poecke RMP, Krishnamurthy V, Dicke M, et al. (2004) A  
552 conserved transcript pattern in response to a specialist and a generalist herbivore. Plant Cell  
553 16: 3132-3147.
- 554 6. Zhao H, Jiang J, Li K, Liu G (2017) Populus simonii × populus nigra wrky70 is involved in  
555 salt stress and leaf blight disease responses. Tree Physiology 37: 1-18.
- 556 7. Lu J, Ju H, Zhou G, Zhu C, Erb M, et al. (2011) An EAR-motif-containing ERF transcription  
557 factor affects herbivore-induced signaling, defense and resistance in rice. The Plant Journal  
558 68: 583-596.
- 559 8. Qi J, Zhou G, Yang L, Erb M, Lu Y, et al. (2011) The chloroplast-localized phospholipases D

- 560  $\alpha 4$  and  $\alpha 5$  regulate herbivore-induced direct and indirect defenses in rice. *Plant Physiology*  
561 157: 1987-1999.
- 562 9. Li P, Song A, Gao C, Wang L, Wang Y, et al. (2015) Chrysanthemum WRKY gene  
563 CmWRKY17 negatively regulates salt stress tolerance in transgenic chrysanthemum and  
564 *Arabidopsis* plants. *Plant Cell Reports* 34: 1365-1378.
- 565 10. Abraham KJ (2018) Metabolism of the plant hormone jasmonate: a sentinel for tissue damage  
566 and master regulator of stress response. *Phytochemistry Reviews* 17: 51-80.
- 567 11. Jiang Y, Guo Li, Ma X, Zhao X, Jiao B, et al. (2017) The wrky transcription factors ptrwrky18  
568 and ptrwrky35 promote melampsora resistance in populus. *Tree Physiology* (5):1-11.
- 569 12. Zhou G, Qi J, Ren N, Cheng J, Erb M, et al. (2009) Silencing OsHI-LOX makes rice more  
570 susceptible to chewing herbivores, but enhances resistance to a phloem feeder. *Plant J.* 60:  
571 638-648.
- 572 13. Wang HH, Hao JJ, Chen XJ, Hao Z, Wang X, et al. (2007) Overexpression of rice WRKY89  
573 enhances ultraviolet B tolerance and disease resistance in rice plants. *Plant Mol Biol*  
574 65:799-815.
- 575 14. Thaler JS, Humphrey PT, Whiteman NK (2012) Evolution of jasmonate and salicylate signal  
576 cross talk. *Trends Plant Science* 17: 260-270.
- 577 15. Maffei M, Bossi S, Spiteller D, Boland AM (2004) Effects of feeding *Spodoptera littoralis* on  
578 lima bean leaves. I. Membrane potentials, intracellular calcium variations, oral secretions,  
579 and regurgitate components. *Plant Physiology* 134: 1752-1762.
- 580 16. Kanchiswamy CN, Takahashi H, Quadro S, Maffei ME, Bossi S, et al. (2010) Regulation of  
581 *Arabidopsis* defense responses against *Spodoptera littoralis* by CPK-mediated calcium  
582 signaling. *BMC Plant Biology* 10: 97.
- 583 17. Zhen ZY, Zhang GS, Yang L, Ma N, Li Q, et al. (2019) Characterization and functional  
584 analysis of calcium /calmodulin-dependent protein kinases (CaMKs) in the  
585 nematode-trapping fungus *Arthrobotrys oligospora*. *Applied Microbiology and*  
586 *Biotechnology* 103:819-832.
- 587 18. Walling LL. (2008) Avoiding effective defenses: Strategies employed by phloem feeding  
588 insects. *Plant Physiology* 146: 859-866.

- 589 19. Mohanta TK, Bashir T, Hashem A, Abd\_Allah EF, Khan AL, et al. (2018) Early events in  
590 plant abiotic stress signaling: interplay between calcium, reactive oxygen species and  
591 phytohormones. *Journal of Plant Growth Regulation* 37: 1033-1049.
- 592 20. Xu YH, Wang JW, Wang S, Wang J, Chen X (2004) Characterization of GaWRKY1, a cotton  
593 transcription factor that regulates the sesquiterpene synthase gene (+)- $\delta$ -cadinene synthase-A.  
594 *Plant Physiol* 135: 507-515.
- 595 21. Rinerson CI, Rabara RC, Tripathi P, Shen QJ, Rushton PJ (2016) Chapter 11-Structure and  
596 Evolution of WRKY Transcription Factors. *Plant Transcription Factors* 163-181.
- 597 22. Huh SU, Lee GJ, Ji HJ, JungJH, Kim Y, et al. (2015) *Capsicum annuum* transcription factor  
598 WRKYa positively regulates defense response upon TMV infection and is a substrate of  
599 CaMK1 and CaMK2. *Scientific Reports* 5: 7981-7981.
- 600 23. Kiranmai K, Lokanadha Rao G, Pandurangaiah M, Nareshkumar A, Amaranatha Reddy V, et  
601 al. (2018) A Novel WRKY Transcription Factor, MuWRKY3(*Macrotyloma uniflorum*Lam.  
602 Verdc.) Enhances Drought Stress Tolerance in Transgenic Groundnut (*Arachis hypogaea* L.)  
603 Plants. *Frontiers in Plant Science* 9: 346-.
- 604 24. Dan Z, Hou L, Xiao P, Guo Y, Deyholos MK, et al. (2019) VvWRKY30, a grape WRKY  
605 transcription factor, plays a positive regulatory role under salinity stress. *Plant Science* 280:  
606 132-142.
- 607 25. Birkenbihl RP, Diezel C, Somssich IE (2012) *Arabidopsis* WRKY33 is a key transcriptional  
608 regulator of hormonal and metabolic responses toward *Botrytis cinerea* infection. *Plant*  
609 *Physiol* 159: 266-285.
- 610 26. Skibbe M, Qu N, Galis I, Baldwin IT (2008) Induced plant defenses in the natural environment:  
611 *Nicotiana attenuata* WRKY3 and WRKY6 coordinate responses to herbivory. *Plant Cell* 20:  
612 1984-2000.
- 613 27. Bhattarai KK (2010) WRKY72-type transcription factors contribute to basal immunity in  
614 tomato and *Arabidopsis* as well as gene-for-gene resistance mediated by the tomato R gene  
615 Mi-1. *Plant Journal for Cell & Molecular Biology* 63: 229-240.
- 616 28. Atamian HS, Eulgem T, Kaloshian I (2012) SlWRXY70 is required for Mi-1-mediated  
617 resistance to aphids and nematodes in tomato. *Planta* 235: 299-309.



- 618 29. Hu LF, Ye M, Li R, Zhang T, Zhou G, et al. (2015) The rice transcription factor WRKY53  
619 suppresses herbivore-induced 24 defenses by acting as a negative feedback modulator of map  
620 kinase activity. *Plant Physiology Preview* 169: 2907-2921.
- 621 30. Liu J, Chen X, Liang X, Zhou X, Yang F, et al. (2016) Alternative splicing of rice WRKY62  
622 and WRKY76 transcription factor genes in pathogen defense. *Plant Physiology* 171:  
623 1427-1442.
- 624 31. Zhang H, Jiang Z, Qin R, Zhang H, Zou J, et al. (2014) Accumulation and cellular toxicity of  
625 aluminum in seedling of *Pinus massoniana*. *BMC Plant Biology* 14:264.
- 626 32. Fang XM, Christenson LM, Wang FC, Zeng JP, Chen FS (2016) Pine caterpillar outbreak and  
627 stand density impacts on nitrogen and phosphorus dynamics and their stoichiometry in  
628 Masson pine (*Pinus massoniana*) plantations in subtropical China. *Canadian Journal of*  
629 *Forest Research* 4: 601-609.
- 630 33. Yu H, Luo C, Fan Y, Zhang X, He X (2020) Isolation and characterization of two  
631 apetala1-like genes from mango (*mangifera indica* L.). *Scientia Horticulturae* 259: 108814.
- 632 34. Chen H, Yang ZQ, Hu Y, Tan JH, Jia J, et al. (2015) Reference genes selection for  
633 quantitative gene expression studies in *Pinus massoniana* L. *Trees* 30: 685-696.
- 634 35. Livak KJ, Schmittgen TD (2001) Analysis of relative gene expression data using real-time  
635 quantitative PCR and the 2<sup>-</sup>(Delta Delta C(T)) Method. *Methods* 25: 402-408.
- 636 36. Chujo T, Miyamoto K, Shimogawa T, Shimizu T, Otake Y, et al. (2013) OsWRKY28, a  
637 PAMP-responsive transrepressor, negatively regulates innate immune responses in rice  
638 against rice blast fungus. *Plant Mol Biol* 82: 23-37.
- 639 37. Rushton PJ, Somssich IE, Ringler P, Shen QJ (2010) WRKY transcription factors. *Trends in*  
640 *Plant Science* 15: 247-258.
- 641 38. Rushton DL, Tripathi P, Rabara RC, Lin J, Ringler P, et al. (2012) WRKY transcription  
642 factors: key components in abscisic acid signalling. *Plant Biotechnol J* 10: 2-11.
- 643 39. Mohanta TK, Occhipinti A, Zebelo SA, Foti M, Fliegmann J, et al. (2012) *Ginkgo bioba*  
644 respinds to herbivory by activating early signaling and direct defenses. *PLoS ONE* 7: e32822.
- 645 40. Vincent TR, Avramova M, Canham J, Higgins P, Bilkey N, et al. (2017) Interplay of plasma  
646 membrane and vacuolar ion channels, together with bak1, elicits rapid cytosolic calcium

- 647 elevations in arabidopsis during aphid feeding. *Plant Cell* 29: 1460-1479.
- 648 41. Yan C, Fan M, Yang M, Zhao J, Zhang W, et al. (2018) Injury activates  
649 Ca<sup>2+</sup>/Calmodulin-dependent phosphorylation of JAV1-JAZ8-WRKY51 complex for  
650 jasmonate biosynthesis. *Molecular Cell* 70:136-149.
- 651 42. Xu L, Liu ZY, Zhang K, Lu Q, Liang J, et al. (2013) Characterization of the *Pinus massoniana*  
652 transcriptional response to *Bursaphelenchus xylophilus* infection using suppression  
653 subtractive hybridization. *Int. J. Mol. Sci.* 14: 11356-11375.
- 654 43. Guo H, Feng P, Chi W, Sun X, Xu X, et al. (2016) Plastid-nucleus communication involves  
655 calcium-modulated mapk signalling. *Nature Communications* 7: 12173.
- 656 44. Boudsocq M, Willmann MR, McCormack M, Lee H, Shan L, et al. (2010) Differential innate  
657 immune signalling via Ca(2+) sensor protein kinases. *Nature* 464: 418-422.
- 658 45. Wang Q, Li JC, Hu LF, Zhang T, Zhang G, et al. (2013) OsMPK3 positively regulates the JA  
659 signaling pathway and plant resistance to a chewing herbivore in rice. *Plant Cell Reports* 32:  
660 1075-1084.
- 661 46. Shen H, Liu C, Zhang Y, Meng X, Zhou X, et al. (2012) OsWRKY30 is activated by MAP  
662 kinases to confer drought tolerance in rice. *Plant Molecular Biology* 80:241-253.
- 663 47. Li G, Meng X, Wang R, Mao G, Han L, et al. (2012) Dual-Level regulation of ACC synthase  
664 activity by MPK3/MPK6 cascade and its downstream WRKY transcription factor during  
665 ethylene induction in *Arabidopsis*. *PLoS Genet* 8: e1002767.
- 666 48. Jiang Y, Liang G, Yang S, Yu D (2014) Arabidopsis WRKY57 Functions as a Node of  
667 Convergence for Jasmonic Acid- and Auxin-Mediated Signaling in Jasmonic Acid-Induced  
668 Leaf Senescence. *Plant Cell* 26: 230-245.
- 669 49. Karim A, Jiang Y, Guo L, Ling Z, Ye S, et al. (2015) Isolation and characterization of a  
670 subgroup iia wrky transcription factor ptrwrky40 from populus trichocarpa. *Tree Physiology*  
671 10: 1129-1139.
- 672 50. Qiu D, Xiao J, Ding X, Xiong M, Cai M, et al. (2007). Osrwky13 mediates rice disease  
673 resistance by regulating defense-related genes in salicylate- and jasmonate-dependent  
674 signaling. *Mol Plant Microbe Interact.* 20: 492-499.
- 675 51. Peng X, Hu Y, Tang X, Zhou P, Deng X, et al. (2012) Constitutive expression of rice wrky30

- 676 gene increases the endogenous jasmonic acid accumulation, pr gene expression and  
677 resistance to fungal pathogens in rice. *Planta* 236: 1485-1498.
- 678 52. Zheng L, Liu GF, Meng XG, Liu YJ, Ji XY, et al. (2013) A WRKY gene from *Tamarix*  
679 *hispidula*, ThWRKY4, mediates abiotic stress responses by modulating reactive oxygen species  
680 and expression of stress-responsive genes. *Plant Molecular Biology* 82: 303-320.
- 681 53. Yu D, Chen CZ (2001) Evidence for an important role of wrky dna binding proteins in the  
682 regulation of npr1 gene expression. *Plant Cell* 13: 1527-1539.
- 683 54. Mao P, Duan MR, Wei CH, Li Y (2007) Wrky62 transcription factor acts downstream of  
684 cytosolic npr1 and negatively regulates jasmonate-responsive gene expression. *Plant & Cell*  
685 *Physiology* 48: 833-842.
- 686 55. Sakamoto T, Miura K, Itoh H, Tatsumi T, Ueguchi-Tanaka M, et al. (2004) An overview of  
687 gibberellin metabolism enzyme genes and their related mutants in rice. *Plant Physiol* 134:  
688 1642-1653.
- 689 56. Eric A, Dawn H, Björn H, Jörg B (2010) Laser microdissection of conifer stem tissues:  
690 Isolation and analysis of high quality RNA, terpene synthase enzyme activity and terpenoid  
691 metabolites from resin ducts and cambial zone tissue of white spruce (*Picea glauca*). *BMC*  
692 *Plant Biology* 10: 106-106.
- 693 57. Pesch M, Hulskamp M (2009) One, two, three...models for trichome patterning in *Arabidopsis*?  
694 *Curr Opin Plant Biol* 12: 587-592.
- 695 58. Christopher IK, Lina LM, Phili Z (2011) The primary diterpene synthase products of *Picea*  
696 *abies* Levopimaradiene/Abietadiene Synthase (PaLAS) are epimers of a thermally unstable  
697 diterpenol. *The Journal of Biological Chemistry* 286: 21145-21153.
- 698 59. Liu PP, von Dahl CC, Klessing DF (2011) The extent to which methyl salicylate is required  
699 for signaling systemic acquired resistance is dependent on exposure to light after infection.  
700 *Plant Physiology* 157: 2216-2226.
- 701 60. Sebastian TS, Casandra HR, Birgit S, Elke S, Christina N, et al. (2014) N-Acyl-Homoserine  
702 lactone primes plants for cell wall reinforcement and induces resistance to bacterial  
703 pathogens via the salicylic Acid/Oxylipin Pathway C. *The Plant Cell* 26: 2708-2723.

704

705

706

707

708

709

710

711

712

713

714

715

716

717

718

719

720

721

722

723

724

725

726

727

728

729 **List of Figures**

730 **Fig 1. WRKY gene in insect resistant and bioinformation analysis**

731 a: three WRKY transcriptomes obtained from 511 differentially genes in High throughput

732 sequencing analysis of transcriptome of insect resistant varieties Vs susceptible varieties. The data

733 is log<sub>2</sub>.Fold\_change of insect resistant varieties Vs susceptible varieties, and each sample  
734 transcriptome replicated three times. b: The analysis of WRKY polygenetic tree. Pm, *Pinus*  
735 *massoniana* L.; Nn, *Nelumbo nucifera*; Vv, *Vitis vinifera*; Qs, *Quercus suber*; Pt, *Populus*  
736 *trichocarpa*; Zj, *Ziziphus jujube*; Cc, *Cajanus cajan*; Jr, *Juglans regia*; Tc, *Theobroma cacao*; Mc,  
737 *Macleaya cordata*; Ac, *Aquilegia coerulea*; Pp, *Physcomitrella patens*; At, *Amborella trichopoda*;  
738 Jc, *Jatropha curcas*; Pe, *Populus euphratica*; Gs, *Glycine soja*; Pb, *Pyrus x bretschneideri*; Eg,  
739 *Elaeis guineensis*. The number of different WRKYs are NnWRKY31 (XP\_010252466.1);  
740 VvWRKY31 (XP\_002269696.2); QsWRKY31 (XP\_023921697.1); PtWRKY31  
741 (XP\_002321134.3); ZjWRKY31 (XP\_015877768.1); CcWRKY31 (XP\_020234210.1);  
742 JrWRKY31 (XP\_018811738.1); TcWRKY31 (EOX93243.1); NnWRKY2 (XP\_010270167.1);  
743 PpWRKY2 (XP\_024368161.1); AtWRKY2 (XP\_006836767.1); VvWRKY2 (CBI39865.3);  
744 JcWRKY2 (XP\_012070967.1); ZjWRKY6 (XP\_015877768.1); QsWRKY6 (XP\_023921697.1);  
745 GsWRKY6 (KHN36523.1); NnWRKY6 (XP\_010252466.1); PbWRKY6 (XP\_018502314.1);  
746 McWRKY6 (OVA03405.1); EgWRKY6 (XP\_010926185.1); PeWRKY6 (XP\_011047241.1);  
747 VvWRKY6 (XP\_002263115.1). c: Prediction of NCBI blasts, SMART and Motif Scan online  
748 software for functional domain analysis of four genes WRLY2, WRKY6, WRKY31, and Lp8 with  
749 Prosite software (<https://prosite.expasy.org/mydomains>) were mapped. Colored sections are the  
750 main functional domains of the genes. d: The annotation and signaling pathways of WRKY2 gene  
751 using KEGG database. b Results of needles volatile substances of insect resistant varieties and  
752 susceptible varieties in May. The results were analyzed by GC and GC-MS (HP6890 gas  
753 chromatograph (Hewlett-Packard Company, USA), GCMS-QP5050A gas chromatography-mass  
754 spectrometry (Shimadzu Corporation, Japan)). The sample was repeated three times.

755 **Fig 2. Two-hybrid screening of PmWRKY31 interactional gene and analysis of interactional**  
756 **gene.**

757 a: Detection of exogenous protein expression of two-hybrid bait. Validation results of Western  
758 blot of Bait expression using Gal4-BD monoclonal antibody in yeast two-hybrid experiment. Lane  
759 1: Y2HGold strain without plasmid (negative control); lane 2: Y2HGold strain with pGBKT7-BD  
760 plasmid (GAL4-BD protein size: 22 KDa); lane 3: Y2HGold strain with pGBKT7-53 plasmid  
761 (protein size: 53KDa); lane 4: Y2HGold strain with PmWRKY31Bait plasmid (approximate  
762 protein size: 92KDa). b: Positive strains obtained from screening. c: positive and negative control  
763 for the two-hybrid screening, A: positive control. Y2Hgold strains with pGBKT7-53 plasmid +  
764 pGADT7-T plasmid were coated to DDO plates and DDO/X/A plates; B: Negative control.  
765 Y2Hgold strains with pGBKT7-Lam plasmid + pGADT7-T plasmid were coated to DDO plate  
766 and DDO/X/A plate. D: Nucleic acid sequence and amino acid sequence information of the Lp8  
767 gene. E: Analysis of the main functional domains of the Lp8 gene.

768 **Fig 3. Interaction between PmWRKY31 and Lp8 *in vitro* and *in vivo***

769 a: Pull down experiments of PmWRKY31 and Lp8 *in vitro*. Constructed a GST prokaryotic  
770 expression vector for the bait Lp8 protein as well as his prokaryotic expression vector of the prey  
771 PmWRKY31 protein, respectively. Western blot was performed after adding loading buffer to  
772 GST- LP8 and His- Wrky fusion proteins to verify the normal expression of the fusion proteins.  
773 The GST protein, GST-LP8 protein with GST resin were incubated with His-Wrky protein  
774 overnight and eluted with reduced glutathione the next day. The following day, the elution was  
775 performed with reduced glutathione. Western blot was performed after appropriate amount of the  
776 eluate was treated with loading buffer. b: BiFC validated interactions of PmLP8 and PmWRKY2,

777 PmWRKY6. PmWRKY31. Construction of pSPYNE-35S-lp8, pSPYCE-35S-wrky2,  
778 pSPYCE-35S-wrky6, pSPYCE-35S-wrky31 vectors were used for BiFC with *Arabidopsis*  
779 *thaliana*. From left to right, the pictures were yellow fluorescence channel, red fluorescence  
780 channel, bright field, and superimposed map. c: localization of PmWRKY31 gene subcellular.  
781 Constructed vector plasmids were transferred into *Agrobacterium*, and tobacco plants in good  
782 growth condition were selected. 1 mL syringe without gun tip was used to inject from the lower  
783 epidermis of tobacco leaves and then labeled; plants were incubated in weak light for 2 days after  
784 injection. Tobacco leaves were taken, observed and photographed with confocal laser microscope  
785 (Olympus FV1000, excitation light: 480, emitting light: 510). From left to right, the pictures were  
786 bright light, Chloroplast auto- fluorescence.

787 **Fig 4. Defense reaction of JA pathway with PmWRKY31**

788 a: JA content in needles in different treatments. b: content of terpene synthase in needles in  
789 different treatments. c: Continuous variation of volatile matter content of needles in different  
790 treatments. d: Effects of different treatments on feeding and excretion of *Dendrolimus*. e:  
791 Expression patterns of terpene synthase genes, key genes of the JA pathway, PmWRKY31 and  
792 Lp8 in different treatments. Each sample was repeated 3 times, \*  $p < 0.05$ , \*\*  $p < 0.01$ , Student's t-  
793 tests.

794 **Fig 5. Defense reaction of of GA pathway with PmWRKY31**

795 a: GA content in needles in different treatments. b: content of terpene synthase in needles in  
796 different treatments. c: Continuous variation of volatile matter content of needles in different  
797 treatments. d: Effects of different treatments on feeding and excretion of *Dendrolimus*. e:  
798 Expression patterns of terpene synthase genes, key genes of the GA pathway, PmWRKY31 and

799 Lp8 in different treatments . Each sample was repeated 3 times, \*  $p < 0.05$ , \*\*  $p < 0.01$ , Student's  
800 t-test.

801 **Fig 6. Defense reaction of ABA and SA pathways with PmWRKY31**

802 a: ABA and GA contents in needles in different treatments. b: content of terpene synthase in  
803 needles in different treatments. c: Continuous variation of volatile matter content of needles in  
804 different treatments. d: Effects of different treatments on feeding and excretion of *Dendrolimus*. e:  
805 Expression patterns of terpene synthase genes, key genes of the ABA and SA pathways,  
806 PmWRKY31 and Lp8 in different treatments . Each sample was repeated 3 times, \*  $p < 0.05$ , \*\*  
807  $p < 0.01$ , Student's t-test.

808 **Fig 7. Verification of PmWRKY31 transgene function**

809 a: Effects of transgene on tobacco plants. b: Effects of transgene on disease resistance. c: Effects  
810 of transgene on drought tolerance. d: Effect of transgene on volatiles. e: Effect of transgene on  
811 hormone content of the plant.

812 **Fig 8. Preliminary model of improvement of insect resistance in *Pinus massoniana* by**  
813 **regulation of hormone signaling pathway of PmWRKY31 and LP8 genes interaction**

814 The application of exogenous signal substances was able to rapidly initiate the expression of  
815 PmWRKY31, PmWRKY2 and PmWRKY6 genes, and increase the downstream hormone signals  
816 and key gene responses of the terpene synthesis pathway by regulating the LP8 gene, thereby  
817 increasing the content of endogenous JA, GA, SA, ABA as well as terpene synthase and volatiles  
818 in *Pinus massoniana* to promote the ability to resist pine caterpillars.

819 **Figures**



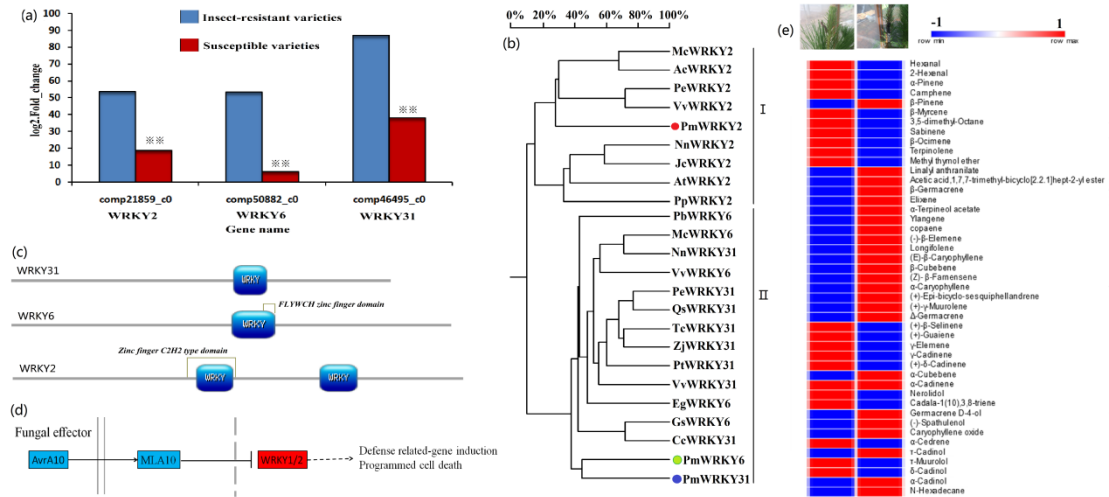

820

### 821 Fig 1. WRKY gene in insect resistant and bioinformatics analysis

822 a: three WRKY transcriptomes obtained from 511 Differentially genes in High throughput  
823 sequencing analysis of transcriptome of insect resistant varieties Vs susceptible varieties. The data  
824 is log<sub>2</sub>Fold\_change of insect resistant varieties Vs susceptible varieties, and each sample  
825 transcriptome replicated three times. b: The analysis of WRKY polygenetic tree. Pm, *Pinus*  
826 *massoniana* L.; Nn, *Nelumbo nucifera*; Vv, *Vitis vinifera*; Qs, *Quercus suber*; Pt, *Populus*  
827 *trichocarpa*; Zj, *Ziziphus jujube*; Cc, *Cajanus cajan*; Jr, *Juglans regia*; Tc, *Theobroma cacao*; Mc,  
828 *Macleaya cordata*; Ac, *Aquilegia coerulea*; Pp, *Physcomitrella patens*; At, *Amborella trichopoda*;  
829 *Jc, Jatropha curcas*; Pe, *Populus euphratica*; Gs, *Glycine soja*; Pb, *Pyrus x bretschneideri*; Eg,  
830 *Elaeis guineensis*. The number of different WRKYs are NnWRKY31 (XP\_010252466.1);  
831 VvWRKY31 (XP\_002269696.2); QsWRKY31 (XP\_023921697.1); PtWRKY31  
832 (XP\_002321134.3); ZjWRKY31 (XP\_015877768.1); CcWRKY31 (XP\_020234210.1);  
833 JrWRKY31 (XP\_018811738.1); TcWRKY31 (EOX93243.1); NnWRKY2 (XP\_010270167.1);  
834 PpWRKY2 (XP\_024368161.1); AtWRKY2 (XP\_006836767.1); VvWRKY2 (CBI39865.3);  
835 JcWRKY2 (XP\_012070967.1); ZjWRKY6 (XP\_015877768.1); QsWRKY6 (XP\_023921697.1);  
836 GsWRKY6 (KHN36523.1); NnWRKY6 (XP\_010252466.1); PbWRKY6 (XP\_018502314.1);  
837 McWRKY6 (OVA03405.1); EgWRKY6 (XP\_010926185.1); PeWRKY6 (XP\_011047241.1);  
838 VvWRKY6 (XP\_002263115.1). c: Prediction of NCBI blasts, SMART and Motif Scan online  
839 software for functional domain analysis of four genes WRKY2, WRKY6, WRKY31, and Lp8 with  
840 Prosite software (<https://prosite.expasy.org/mydomains>) were mapped. Colored sections are the  
841 main functional domains of the genes. d: The annotation and signaling pathways of WRKY2 gene  
842 using KEGG database. e: Results of needles volatile substances of insect resistant and  
843 susceptible varieties in May. The results were analyzed by GC and GC-MS (HP6890 gas  
844 chromatograph (Hewlett-Packard Company, USA), GCMS-QP5050A gas chromatography-mass  
845 spectrometry (Shimadzu Corporation, Japan)). The sample was repeated three times.

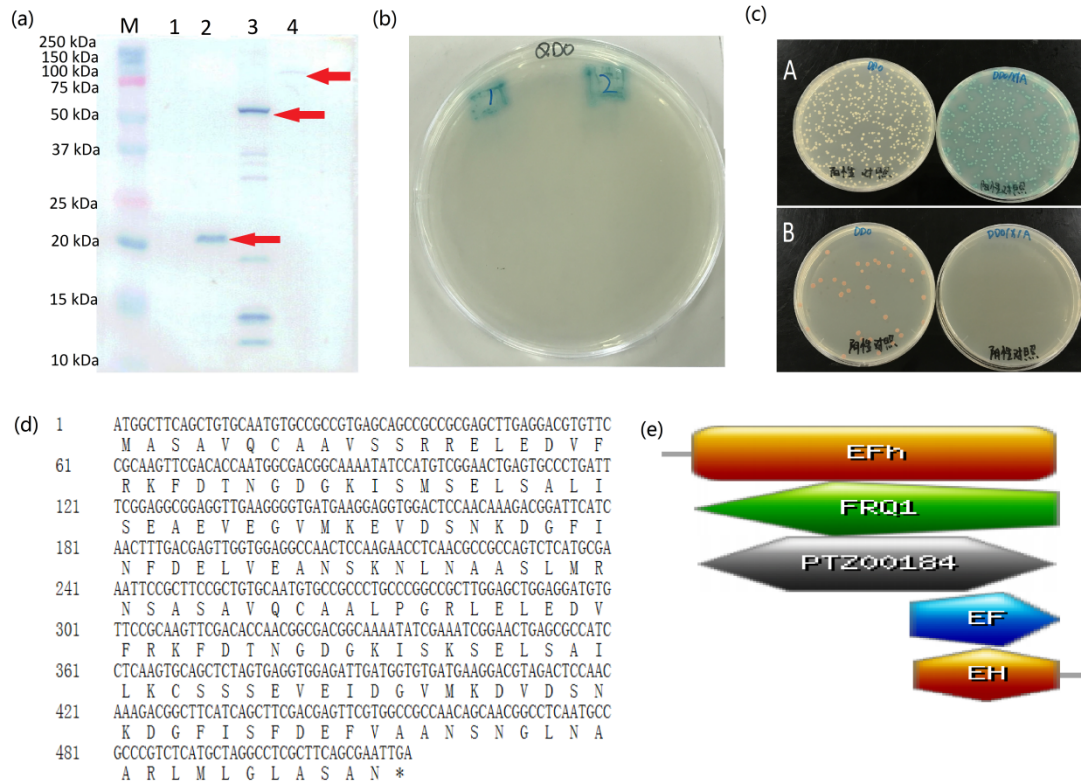

846  
847 **Fig 2. Two-hybrid screening of PmWRKY31 interactional gene and analysis of interactional**  
848 **gene.**

849 a: Detection of exogenous protein expression of two-hybrid bait. Validation results of Western  
850 blot of Bait expression using Gal4-BD monoclonal antibody in yeast two-hybrid experiment. Lane  
851 1: Y2HGold strain without plasmid (negative control); lane 2: Y2HGold strain with pGBKT7-BD  
852 plasmid (GAL4-BD protein size: 22 KDa); lane 3: Y2HGold strain with pGBKT7-53 plasmid  
853 (protein size: 53KDa); lane 4: Y2HGold strain with PmWRKY31Bait plasmid (approximate  
854 protein size: 92KDa). b: Positive strains obtained from screening. c: positive and negative control  
855 for the two-hybrid screening, A: positive control. Y2Hgold strains with pGBKT7-53 plasmid +  
856 pGADT7-T plasmid were coated to DDO plates and DDO/X/A plates; B: Negative control.  
857 Y2Hgold strains with pGBKT7-Lam plasmid + pGADT7-T plasmid were coated to DDO plate  
858 and DDO/X/A plate. d: Nucleic acid sequence and amino acid sequence information of the Lp8  
859 gene. E: Analysis of the main functional domains of the Lp8 gene.

860  
861  
862

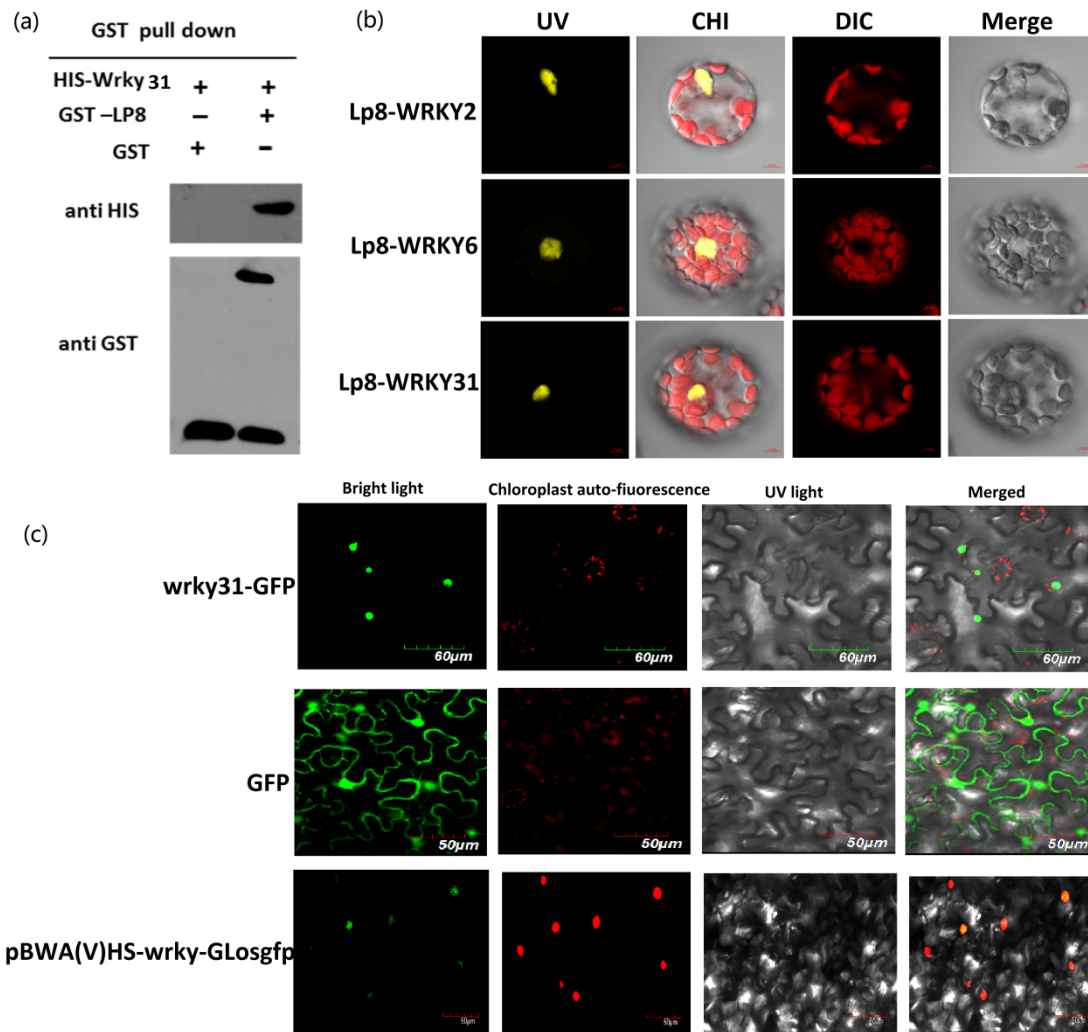

863

864 **Fig 3. Interaction between PmWRKY31 and Lp8 *in vitro* and *in vivo***

865 a: Pull down experiments of PmWRKY31 and Lp8 *in vitro*. Constructed a GST prokaryotic  
866 expression vector for the bait Lp8 protein as well as his prokaryotic expression vector of the prey  
867 PmWRKY31 protein, respectively. Western blot was performed after adding loading buffer to  
868 GST- LP8 and His- Wrky fusion proteins to verify the normal expression of the fusion proteins.  
869 The GST protein, GST-LP8 protein with GST resin were incubated with His-Wrky protein  
870 overnight and eluted with reduced glutathione the next day. The following day, the elution was  
871 performed with reduced glutathione. Western blot was performed after appropriate amount of the  
872 eluate was treated with loading buffer. b: BiFC validated interactions of PmLP8 and PmWRKY2,  
873 PmWRKY6. PmWRKY31. Construction of pSPYNE-35S-lp8, pSPYCE-35S-wrky2,  
874 pSPYCE-35S-wrky6, pSPYCE-35S-wrky31 vectors were used for BiFC with *Arabidopsis*  
875 *thaliana*. From left to right, the pictures were yellow fluorescence channel, red fluorescence  
876 channel, bright field, and superimposed map. c: localization of PmWRKY31 gene subcellular.  
877 Constructed vector plasmids were transferred into *Agrobacterium*, and tobacco plants in good  
878 growth condition were selected. 1 mL syringe without gun tip was used to inject from the lower  
879 epidermis of tobacco leaves and then labeled; plants were incubated in weak light for 2 days after  
880 injection. Tobacco leaves were taken, observed and photographed with confocal laser microscope  
881 (Olympus FV1000, excitation light: 480, emitting light: 510). From left to right, the pictures were

882 bright light, Chloroplast auto- fluorescence.

883

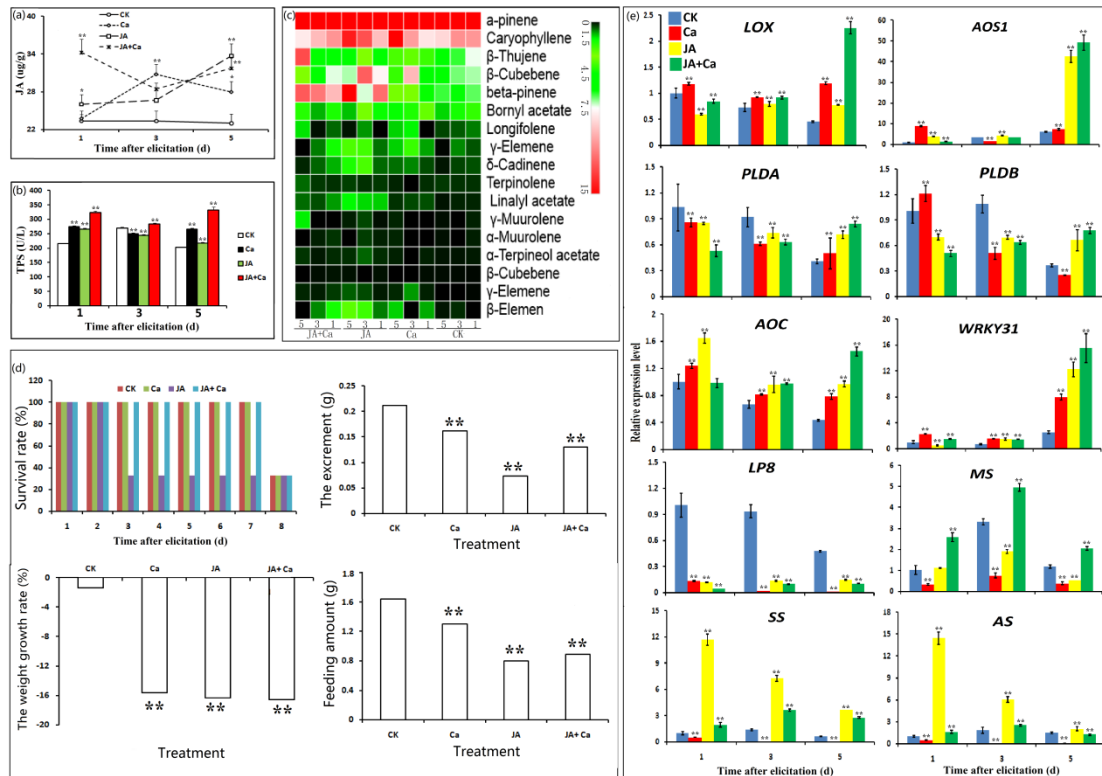

884

885 **Fig 4. Defense reaction of JA pathway with PmWRKY31**

886

887 a: JA content in needles in different treatments. b: content of terpene synthase in needles

888 in different treatments. c: Continuous variation of volatile matter content of needles in different

889 treatments. d: Effects of different treatments on feeding and excretion of *Dendrolimus*. e:

890 Expression patterns of terpene synthase genes, key genes of the JA pathway, PmWRKY31 and

891 Lp8 in different treatments. Each sample was repeated 3 times, \*  $p < 0.05$ , \*\*  $p < 0.01$ , Student's t-

891 tests.

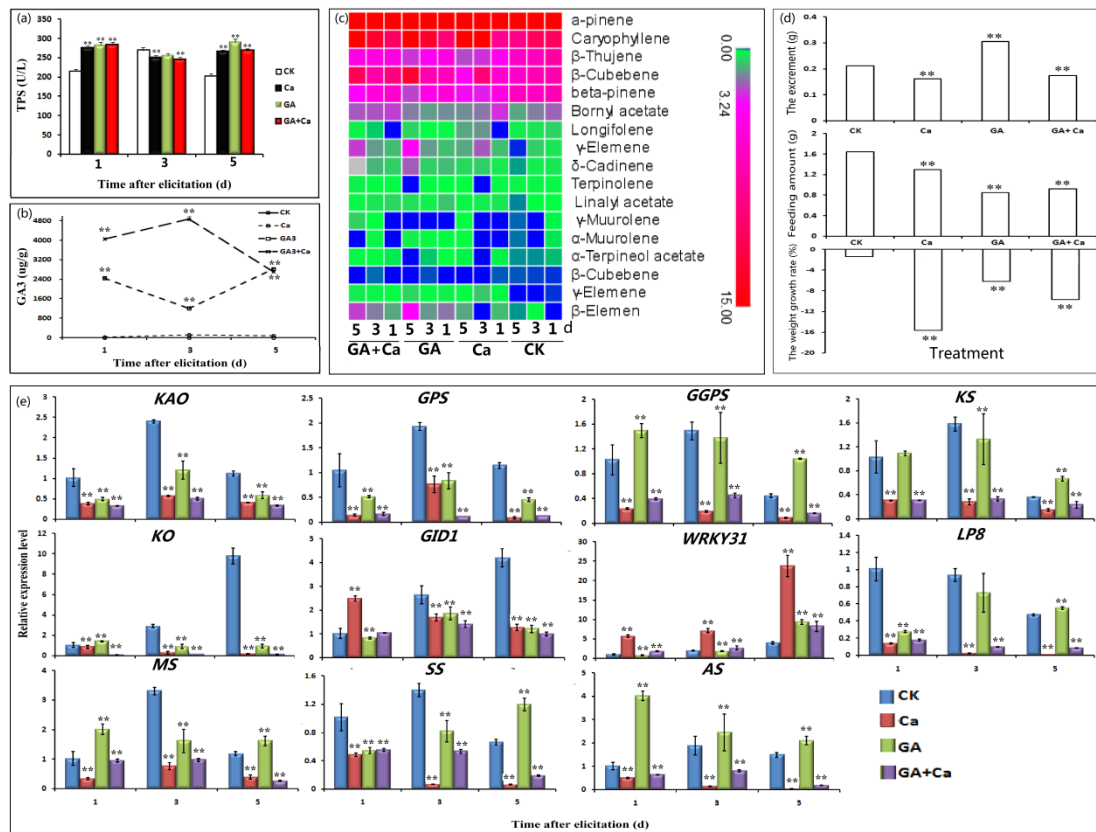

892  
893  
894  
895  
896  
897  
898  
899  
900

**Fig 5. Defense reaction of of GA pathway with PmWRKY31**

a: GA content in needles in different treatments. b: content of terpene synthase in needles in different treatments. c: Continuous variation of volatile matter content of needles in different treatments. d: Effects of different treatments on feeding and excretion of *Dendrolimus*. e: Expression patterns of terpene synthase genes, key genes of the GA pathway, PmWRKY31 and Lp8 in different treatments. Each sample was repeated 3 times, \*  $p < 0.05$ , \*\*  $p < 0.01$ , Student's t-test.

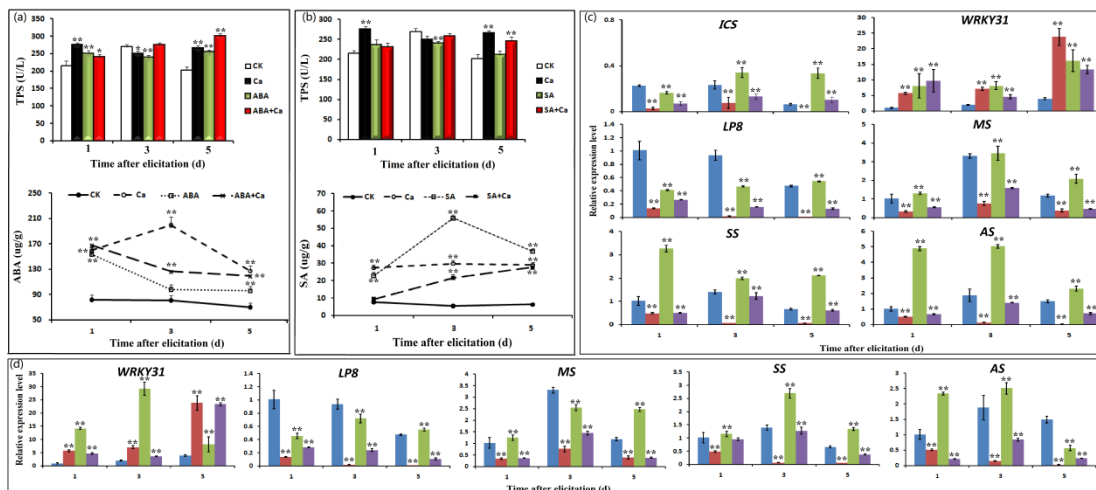

901  
902  
903  
904  
905

**Fig 6. Defense reaction of ABA and SA pathways with PmWRKY31**

a: ABA and GA contents in needles in different treatments. b: content of terpene synthase in needles in different treatments. c: Continuous variation of volatile matter content of needles in different treatments. d: Effects of different treatments on feeding and excretion of *Dendrolimus*. e:

906 Expression patterns of terpene synthase genes, key genes of the ABA and SA pathways,  
 907 PmWRKY31 and Lp8 in different treatments . Each sample was repeated 3 times, \*  $p < 0.05$ , \*\*  
 908  $p < 0.01$ , Student's t-test.  
 909

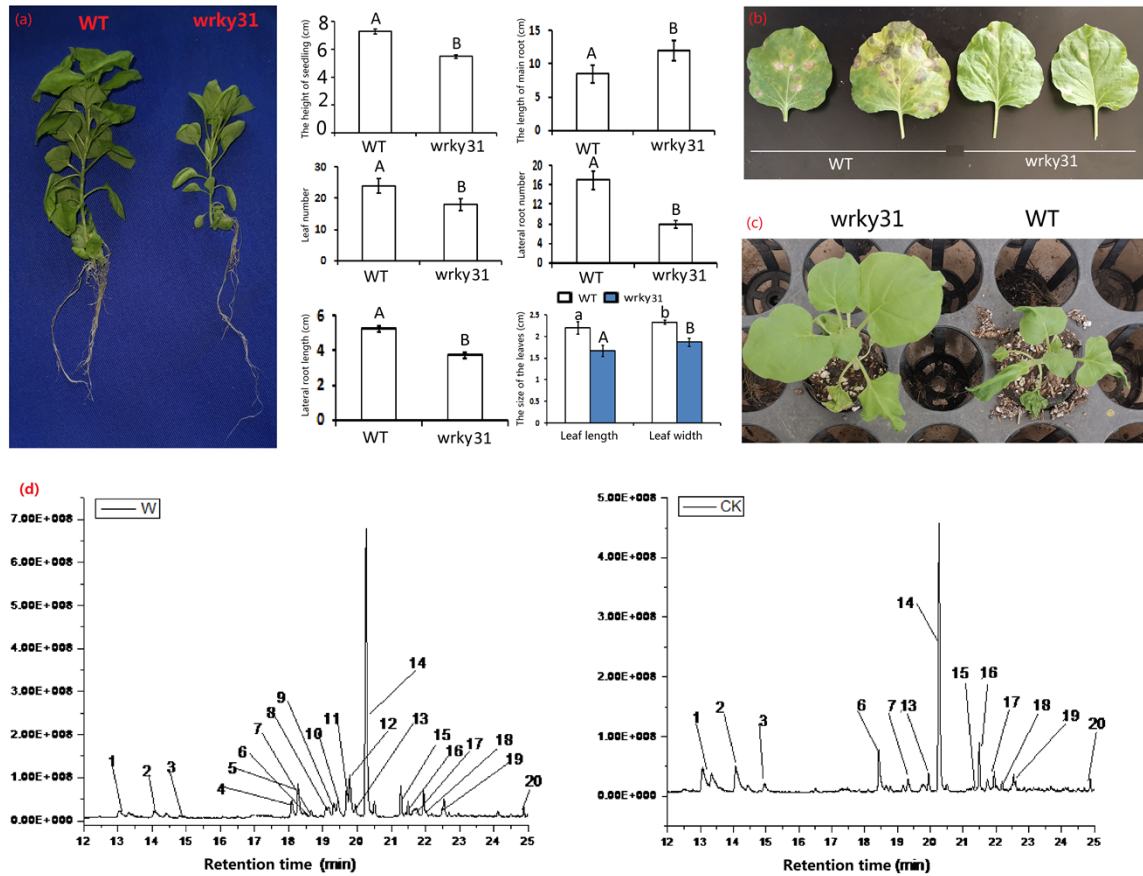

910

911 **Fig 7. Verification of PmWRKY31 transgene function**

912 a: Effects of transgene on tobacco plants. b: Effects of transgene on disease resistance. c: Effects  
 913 of transgene on drought tolerance. d: Effect of transgene on volatiles. E: Effect of transgene on  
 914 hormone content of the plant.

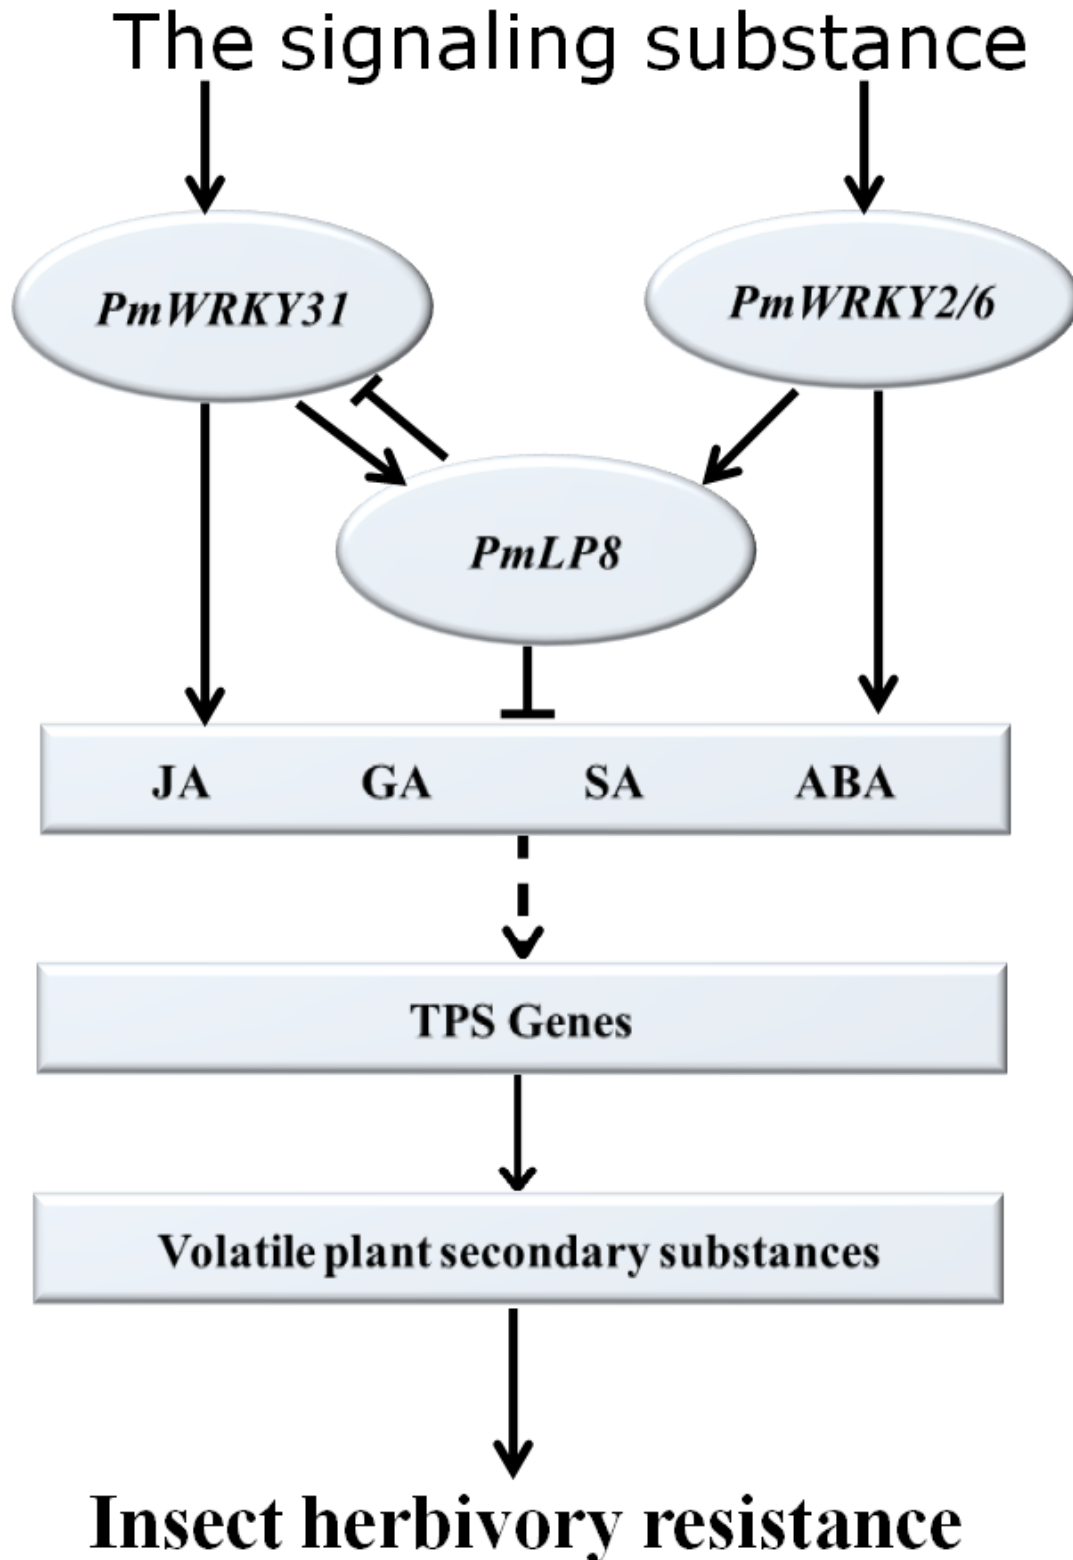

915

916 **Fig 8. Preliminary model of improvement of insect resistance in *P. massoniana* by regulation**  
917 **of hormone signaling pathway of PmWRKY31 and PmLP8 genes interaction**

918 The application of exogenous signal substances was able to rapidly initiate the expression of  
919 PmWRKY31, PmWRKY2 and PmWRKY6 genes, and increase the downstream hormone signals

920 and key gene responses of the terpene synthesis pathway by regulating the LP8 gene, thereby  
921 increasing the content of endogenous JA, GA, SA, ABA as well as terpene synthase and volatiles  
922 in *Pinus massoniana* to promote the ability to resist pine caterpillars.
